CORRECTION

# Correction: Transcriptomics analysis of the bovine endometrium during the perioestrus period

Mohammed A. Alfattah, Carolina N. Correia, John A. Browne, Paul A. McGettigan, Katarzyna Pluta, Stephen D. Carrington, David E. MacHugh, Jane A. Irwin

After the publication of this article [1], concerns were raised about identical tables across distinct time points and contradictory statements. Here, the authors have provided additional information to clarify these issues:

In the Results section of this paper, [Tables 1](#) and [2](#) contain duplicate data as that of Table 4 by error. Tables 1–5 are intended as summaries of the data presented in S3 Table, which are correct. Please see the corrected [Tables 1](#) and [2](#) here.

The authors have provided the following corrections

In the Discussion section, the fourth paragraph under the subheading “Tissue remodelling and innervation in the proliferative phase” is incorrect. This paragraph should be disregarded.

In the Discussion section, the statement comprising the fourth and fifth sentences in the seventh paragraph under the subheading “Tissue remodelling and innervation in the proliferative phase” is incorrect. These sentences should be disregarded. The corrected paragraph is:

“For both time points before oestrus, transforming growth factor beta 1 (TGF- $\beta$ 1), the cytokine tumour necrosis factor (TNF), and HDAC (group of histone deacetylases) were among the top ranked upstream regulators (Table 7). TGF- $\beta$ 1 is required for the development of smooth muscle in the female reproductive tract [93], as well as being present in seminal fluid and altering the endometrium and oviduct to promote embryonic development and implantation [94]. In humans, expression of TNF has also been shown to rise in the mid- to late-proliferative phases [95], while in bovine endometrial cells, TNF-induced production of chemokines [96], directs the migration of leukocytes to inflammation sites [97]. These observations suggest that endometrial immunity is upregulated at this timepoint, actively preparing for sperm deposition and pathogen entry. The top interaction networks for CIDR+12 h and CIDR+24 h are centred on the transcription factor NF- $\kappa$ B complex (Figs 4 and 5) although these are different networks. For the CIDR+12 h top network, involved in Endocrine system disorders, Hereditary disorders and Organismal injury and abnormalities, NF- $\kappa$ B is linked to various hub genes, such as *SUSD4*, which negatively regulates complement activation, and *ALDH1B1*, which links to various aldehyde dehydrogenases. The top network for CIDR+24 h is Neurological disease, Nervous System Development and

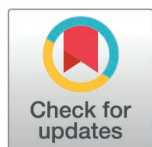

## OPEN ACCESS

**Citation:** Alfattah MA, Correia CN, Browne JA, McGettigan PA, Pluta K, Carrington SD et al. (2025) Correction: Transcriptomics analysis of the bovine endometrium during the perioestrus period. PLoS One 20(5): e0324686. <https://doi.org/10.1371/journal.pone.0324686>

**Published:** May 20, 2025

**Copyright:** © 2025 Alfattah et al. This is an open access article distributed under the terms of the [Creative Commons Attribution License](#), which permits unrestricted use, distribution, and reproduction in any medium, provided the original author and source are credited.

**Table 1. Top DEGs in bovine endometrium at 12h post-CIDR removal versus oestrus, ranked by ascending B-H FDR.**

| Entrez ID            | Gene Name                                                           | Gene Symbol         | Log <sub>2</sub> fold-change | P-Value                | B-H FDR                |
|----------------------|---------------------------------------------------------------------|---------------------|------------------------------|------------------------|------------------------|
| <b>Upregulated</b>   |                                                                     |                     |                              |                        |                        |
| 617325               | kinase suppressor of ras 2                                          | <i>KSR2</i>         | 4.71                         | $1.13 \times 10^{-13}$ | $4.80 \times 10^{-10}$ |
| 282248               | hypocretin (orexin) receptor 1                                      | <i>HCRTR1</i>       | 3.23                         | $2.00 \times 10^{-12}$ | $2.60 \times 10^{-09}$ |
| 509642               | tubulointerstitial nephritis antigen-like 1                         | <i>TINAGL1</i>      | 2.14                         | $4.63 \times 10^{-09}$ | $2.53 \times 10^{-06}$ |
| 522479               | ovalbumin                                                           | <i>LOC522479</i>    | 4.54                         | $6.04 \times 10^{-09}$ | $3.19 \times 10^{-06}$ |
| 282361               | solute carrier family 5 (sodium/glucose cotransporter), member 1    | <i>SLC5A1</i>       | 5.91                         | $8.10 \times 10^{-09}$ | $4.15 \times 10^{-06}$ |
| 615277               | acyl-coenzyme A thioesterase THEM4                                  | <i>LOC615277</i>    | 6.26                         | $9.06 \times 10^{-09}$ | $4.38 \times 10^{-06}$ |
| 104974435            | uncharacterized LOC104974435                                        | <i>LOC104974435</i> | 6.38                         | $1.16 \times 10^{-08}$ | $5.02 \times 10^{-06}$ |
| 786974               | beta-hexosaminidase subunit beta                                    | <i>LOC786974</i>    | 2.79                         | $1.94 \times 10^{-08}$ | $7.82 \times 10^{-06}$ |
| 613555               | disrupted in schizophrenia 1                                        | <i>DISC1</i>        | 2.00                         | $3.05 \times 10^{-08}$ | $1.17 \times 10^{-05}$ |
| 101905783            | uncharacterized LOC101905783                                        | <i>LOC101905783</i> | 4.34                         | $5.19 \times 10^{-08}$ | $1.76 \times 10^{-05}$ |
| <b>Downregulated</b> |                                                                     |                     |                              |                        |                        |
| 509600               | glycoprotein (transmembrane) nmb                                    | <i>GPNUMB</i>       | -3.92                        | $4.61 \times 10^{-17}$ | $7.81 \times 10^{-13}$ |
| 280852               | midkine (neurite growth-promoting factor 2)                         | <i>MDK</i>          | -2.13                        | $3.97 \times 10^{-16}$ | $3.36 \times 10^{-12}$ |
| 353114               | neuronatin                                                          | <i>NNAT</i>         | -3.22                        | $1.10 \times 10^{-13}$ | $4.80 \times 10^{-10}$ |
| 519120               | pyridine nucleotide-disulphide oxidoreductase domain 2              | <i>PYROXD2</i>      | -2.2                         | $2.98 \times 10^{-13}$ | $1.01 \times 10^{-09}$ |
| 531699               | aldehyde oxidase 2                                                  | <i>AOX2</i>         | -5.85                        | $3.90 \times 10^{-13}$ | $1.10 \times 10^{-09}$ |
| 513038               | cathepsin K                                                         | <i>CTSK</i>         | -2.81                        | $7.59 \times 10^{-13}$ | $1.61 \times 10^{-09}$ |
| 616777               | family with sequence similarity 180, member A                       | <i>FAM180A</i>      | -3.87                        | $6.75 \times 10^{-13}$ | $1.61 \times 10^{-09}$ |
| 511839               | ATPase, H <sup>+</sup> transporting, lysosomal 38kDa, V0 subunit d2 | <i>ATP6V0D2</i>     | -5.69                        | $8.94 \times 10^{-13}$ | $1.68 \times 10^{-09}$ |
| 789851               | histamine receptor H3                                               | <i>HRH3</i>         | -6.41                        | $1.21 \times 10^{-12}$ | $2.04 \times 10^{-09}$ |
| 100140069            | WD repeat domain 86                                                 | <i>WDR86</i>        | -3.11                        | $1.68 \times 10^{-12}$ | $2.54 \times 10^{-09}$ |

<https://doi.org/10.1371/journal.pone.0324686.t001>

**Table 2. Top DEGs in bovine endometrium at 24h post-CIDR removal versus oestrus, ranked by ascending B-H FDR.**

| Entrez ID            | Gene Name                                                             | Gene Symbol         | Log <sub>2</sub> fold-change | P-Value                | B-H FDR                |
|----------------------|-----------------------------------------------------------------------|---------------------|------------------------------|------------------------|------------------------|
| <b>Upregulated</b>   |                                                                       |                     |                              |                        |                        |
| 617325               | kinase suppressor of ras 2                                            | <i>KSR2</i>         | 3.42                         | $7.62 \times 10^{-09}$ | $1.07 \times 10^{-05}$ |
| 615152               | chromosome 14 open reading frame, human C8orf34                       | <i>C14H8orf34</i>   | 3.0                          | $8.62 \times 10^{-07}$ | $4.42 \times 10^{-04}$ |
| 101906467            | uncharacterized LOC101906467                                          | <i>LOC101906467</i> | 3.22                         | $1.29 \times 10^{-06}$ | $6.22 \times 10^{-04}$ |
| 506696               | paraspeckle component 1                                               | <i>PSPC1</i>        | 0.95                         | $1.46 \times 10^{-06}$ | $6.84 \times 10^{-04}$ |
| 280894               | placental growth factor                                               | <i>PGF</i>          | 1.81                         | $1.63 \times 10^{-06}$ | $7.28 \times 10^{-04}$ |
| 530102               | collagen, type VI, alpha 6                                            | <i>COL6A6</i>       | 7.16                         | $2.08 \times 10^{-06}$ | $9.03 \times 10^{-04}$ |
| 282361               | solute carrier family 5 (sodium/glucose cotransporter), member 1      | <i>SLC5A1</i>       | 4.48                         | $2.85 \times 10^{-06}$ | $1.15 \times 10^{-03}$ |
| 616625               | aquaporin 12B                                                         | <i>AQP12B</i>       | 5.12                         | $6.13 \times 10^{-06}$ | $2.21 \times 10^{-03}$ |
| 286767               | parathyroid hormone-like hormone                                      | <i>PTH1H</i>        | 1.96                         | $8.81 \times 10^{-06}$ | $2.98 \times 10^{-03}$ |
| 530709               | Usher syndrome 1C (autosomal recessive, severe)                       | <i>USH1C</i>        | 2.96                         | $9.39 \times 10^{-06}$ | $3.07 \times 10^{-03}$ |
| <b>Downregulated</b> |                                                                       |                     |                              |                        |                        |
| 353114               | neuronatin                                                            | <i>NNAT</i>         | -3.19                        | $1.92 \times 10^{-13}$ | $3.25 \times 10^{-09}$ |
| 509600               | glycoprotein (transmembrane) nmb                                      | <i>GPNUMB</i>       | -3.28                        | $7.72 \times 10^{-13}$ | $6.53 \times 10^{-09}$ |
| 789851               | histamine receptor H3                                                 | <i>HRH3</i>         | -6.35                        | $1.84 \times 10^{-12}$ | $1.04 \times 10^{-08}$ |
| 616010               | anthrax toxin receptor 1                                              | <i>ANTXR1</i>       | -2.15                        | $3.25 \times 10^{-12}$ | $1.37 \times 10^{-08}$ |
| 519120               | pyridine nucleotide-disulphide oxidoreductase domain 2                | <i>PYROXD2</i>      | -1.95                        | $9.78 \times 10^{-11}$ | $3.31 \times 10^{-07}$ |
| 281487               | premelanosome protein                                                 | <i>PMEL</i>         | -3.34                        | $2.09 \times 10^{-10}$ | $5.88 \times 10^{-07}$ |
| 522392               | matrix-remodelling associated 8                                       | <i>MXRA8</i>        | -2.12                        | $9.91 \times 10^{-10}$ | $2.39 \times 10^{-06}$ |
| 508098               | uncharacterized LOC508098                                             | <i>LOC508098</i>    | -7.26                        | $1.98 \times 10^{-09}$ | $4.19 \times 10^{-06}$ |
| 338446               | peroxisome proliferator-activated receptor gamma, coactivator 1 alpha | <i>PPARGC1A</i>     | -2.73                        | $2.80 \times 10^{-09}$ | $5.26 \times 10^{-06}$ |
| 616660               | tetraspanin 11                                                        | <i>TSPAN11</i>      | -1.79                        | $3.15 \times 10^{-09}$ | $5.33 \times 10^{-06}$ |

<https://doi.org/10.1371/journal.pone.0324686.t002>

Function and Behavior, with links to voltage-dependent Na<sup>+</sup> channels and SYN genes, encoding synapsins that are associated with the trafficking of synaptic vesicles.”

## Reference

1. Alfattah MA, Correia CN, Browne JA, McGettigan PA, Pluta K, Carrington SD, et al. Transcriptomics analysis of the bovine endometrium during the perioestrus period. PLoS One. 2024;19(3):e0301005. <https://doi.org/10.1371/journal.pone.0301005> PMID: [38547106](https://pubmed.ncbi.nlm.nih.gov/38547106/)
